1 **High-Resolution Maps of Mouse Reference Populations**

2 Petr Simecek<sup>1,2</sup>, Jiri Forejt<sup>2</sup>, Robert W. Williams<sup>3</sup>, Toshihiko Shiroishi<sup>4</sup>, Toyoyuki  
3 Takada<sup>4</sup>, Lu Lu<sup>3</sup>, Thomas E. Johnson<sup>5</sup>, Beth Bennett<sup>5</sup>, Christian F. Deschepper<sup>6</sup>,  
4 Marie-Pier Scott-Boyer<sup>6</sup>, Gary Churchill<sup>1,8</sup>, Fernando Pardo-Manuel de Villena<sup>7,8</sup>

5 1) The Jackson Laboratory, Bar Harbor, ME, US

6 2) Institute of Molecular Genetics of the ASCR, Division BIOCEV, Vestec, Czech  
7 Rep.

8 3) University of Tennessee Health Science Center, Memphis, TN, US

9 4) National Institute of Genetics, Japan

10 5) University of Colorado at Boulder, CO, US

11 6) Institut de Recherches Cliniques, Montreal, QC, Canada

12 7) Department of Genetics, Lineberger Comprehensive Cancer Center, University of  
13 North Carolina at Chapel Hill, Chapel Hill, NC, US

14 8) Corresponding authors: Gary Churchill (Gary.Churchill@jax.org) and Fernando  
15 Pardo-Manuel de Villena (Fernando@med.unc.edu)

16

17

1 Running title: High-Resolution Maps of Reference Populations

2 Keywords: chromosome substitution strains, recombinant inbred strains, mouse

3 diversity genotyping array, gene conversions

4

5

6

7

8

9

10

11

12 Correspondence to:

13

14 Gary Churchill

15 The Jackson Laboratory, 600 Main Street, Bar Harbor, ME 04609 USA

16 Tel: +1 207-288-6189

17 Email: [gary.churchill@jax.org](mailto:gary.churchill@jax.org)

18

19 Fernando Pardo-Manuel de Villena

20 University of North Carolina at Chapel Hill, 5046 Genetic Medicine Bldg, CB#7264,

21 Chapel Hill, NC 27599-7264 USA

22 Tel: +1 919-843-5403

23 Email: [fernando@med.unc.edu](mailto:fernando@med.unc.edu)

1 **Abstract**

2 Genetic reference panels are widely used to map complex, quantitative traits in  
3 model organisms. We have generated new high-resolution genetic maps of 259  
4 mouse inbred strains from recombinant inbred strain panels (C57BL/6J x DBA/2J,  
5 ILS/lbgTejJ x ISS/lbgTejJ, C57BL/6J x A/J) and chromosome substitution strain  
6 panels (C57BL/6J-Chr#<A/J>, C57BL/6J-Chr#<PWD/Ph>, C57BL/6J-  
7 Chr#<MSM/Ms>). We genotyped all samples using the Affymetrix Mouse Diversity  
8 Array with an average inter-marker spacing of 4.3kb. The new genetic maps provide  
9 increased precision in the localization of recombination breakpoints compared to the  
10 previous maps. Although the strains were presumed to be fully inbred, we found  
11 residual heterozygosity in 40% of individual mice from five of the six panels. We also  
12 identified *de novo* deletions and duplications, in homozygous or heterozygous state,  
13 ranging in size from 21kb to 8.4Mb. Almost two-thirds (46 out of 76) of these  
14 deletions overlap exons of protein coding genes and may have phenotypic  
15 consequences. Twenty-nine putative gene conversions were identified in the  
16 chromosome substitution strains. We find that gene conversions are more likely to  
17 occur in regions where the homologous chromosomes are more similar. The raw  
18 genotyping data and genetic maps of these strain panels are available at  
19 <http://churchill-lab.jax.org/website/MDA>.

20

## 1 Introduction

2 The laboratory mouse is the most widely used mammalian model organism for  
3 biomedical research. Among the key advantages of mice are a well-annotated  
4 reference genome (CHINWALLA *et al.* 2002), over one hundred strain-specific genome  
5 sequences (KEANE *et al.* 2011), (MORGAN *et al.* 2016), (CC Genomes, Genetics  
6 2017), and many genetic reference populations, including multi-parent strain panels  
7 (CONSORTIUM 2012) and outbred stocks (CHURCHILL *et al.* 2012), and strains carrying  
8 null alleles at most protein coding genes. There are dozens of readily available  
9 inbred strains that capture a wealth of genetic variants and display unique phenotypic  
10 characters (BECK *et al.* 2000), (YANG *et al.* 2011).

11 Genetic reference populations of mice include collections of strains that reassort a  
12 fixed set of genetic variants such as *chromosome substitution strain* (CSS) and  
13 *recombinant inbred strain* (RIS) panels. Chromosome substitution strains, also known  
14 as consomic strains, combine genomes of two founder inbred strains by substituting  
15 one chromosome pair from the *donor strain* into the genetic background of the *host*  
16 *strain* (NADEAU *et al.* 2012). The mouse genome is composed of 19 pairs of  
17 autosomal chromosomes, X and Y sex chromosomes, and a mitochondrial genome,  
18 thus a minimum of 22 strains could constitute a complete CSS panel. In some cases  
19 it has proven difficult to introgress a specific entire donor strain chromosome into the  
20 host background and the complete CSS panel may include partial chromosome  
21 substitutions and consists of more than 22 strains. RIS also combine genomes of two  
22 founder strains; they are derived from one or more generations of outcrossing  
23 followed by sibling mating to produce new inbred strains whose genomes are  
24 mosaics of the founder genomes (WILLIAMS *et al.* 2001). Both RIS and CSS panels

1 have been successfully applied to the mapping of complex traits (BUCHNER and  
2 NADEAU 2015).

3 We have carried out high-density genotyping of three RIS panels C57BL/6J x DBA/2J  
4 (BXD), ILS/lbgTejJ x ISS/lbgTejJ (LXS), C57BL/6J x A/J (AXB/BXA) and three CSS  
5 panels C57BL/6J-Chr#<A/J> (B6.A), C57BL/6J-Chr#<PWD/Ph> (B6.PWD),  
6 C57BL/6J-Chr#<MSM/Ms> (B6.MSM) using the Affymetrix Mouse Diversity Array  
7 (MDA). The MDA includes approximately 623,000 probe sets that assay single  
8 nucleotide polymorphisms (SNPs) plus an additional 916,000 invariant genomic  
9 probes targeted to genetic deletions or duplications (YANG *et al.* 2009). These data  
10 add value to the strain panels by more precisely localizing the recombination  
11 breakpoints between founder strains. In addition they reveal some unexpected  
12 features in the genomes of individual strains.

## 13 **Materials and Methods**

### 14 ***Animals***

15 We generated high-density genotype data for six mouse strain panels (Table 1):  
16 three panels of RIS and three panels of CSS. Mice for genotyping from five panels  
17 were available at the Jackson Laboratory (Bar Harbor, ME, USA) or from BXD colony  
18 at University of Tennessee Health Science Center (UTHSC); DNA samples from the  
19 sixth panel, B6.MSM CSS, were provided by T. Shiroishi (National Institute of  
20 Genetics, Japan). Unless stated otherwise, we genotyped one mouse per strain.  
21 Most strains are represented by a single male animal (255 males) but for four strains  
22 we genotyped an individual female (BXD14, BXD54, BXD59, BXD76). Samples were  
23 mainly from cases bred in 2008.

1 The AXB/BXA RIS panel (NESBITT and SKAMENE 1984) was derived from intercrosses  
2 of the C57BL/6J (B or B6) and A/J (A) strains. Note that hereafter the dam is denoted  
3 first and the sire last. Thus the difference between AXB and BXA strains is the  
4 direction of the intercross mating that generated (AxB)F1s or (BxA)F1s, respectively.  
5 We genotyped 25 strains: AXB strains 1, 2, 4-6, 8, 10, 12, 13, 15, 18, 23, 24; and  
6 BXA strains 1, 2, 4, 11-14, 16, 17, 24-26.

7 The LXS RIS panel (WILLIAMS *et al.* 2004) was generated at the Institute for  
8 Behavioral Genetics, Bolder, CO from founder strains, Inbred Long-Sleep (L or ILS)  
9 and Inbred Short-Sleep (S or ISS). These founder strains were in turn derived as  
10 selection lines from a cross population with eight founder strains (A, AKR, BALB/c,  
11 C3H/Crgl/2, C57BL/Crgl, DBA/2, IS/Bi and RIII). We genotyped 64 strains: LXS 3, 5,  
12 7-9, 13, 14, 16, 19, 22-26, 28, 32, 34-36, 39, 41-43, 46, 48-52, 56, 60, 62, 64, 66, 70,  
13 72, 73, 75, 76, 78, 80, 84, 86, 87, 89, 90, 92-94, 96-103, 107, 110, 112, 114, 115,  
14 122, 123.

15 The BXD RIS panel was derived from founder strains C57BL/6J (B or B6) and  
16 DBA/2J (D or D2) inbred mice in three epochs: epoch I, strains 1-32 (TAYLOR *et al.*  
17 1975); epoch II, 33-42 (TAYLOR *et al.* 1999), and the epoch III advanced RIS 43-102  
18 (PEIRCE *et al.* 2004b). The latter were outcrossed for multiple generations before  
19 inbreeding. We genotyped 91 strains: BXD 1, 2, 5, 6, 8, 9, 11-16, 18-25, 27-36, 38-  
20 40, 42-45, 47-56, 59-71, 73-102 (note that the designation of several BXD strains  
21 have been modified as a result of the genotyping results described in the present  
22 study, and BXD103 is now known as BXD73b).

23 The B6.A CSS panel (NADEAU *et al.* 2000) consists of 22 strains derived from  
24 C57BL/6J (host) and A/J (donor) by J. Nadeau at Case Western Reserve University.

1 The panel includes 19 autosomes, X and Y chromosomes, and the mitochondrial  
2 genome.

3 The B6.PWD CSS panel (GREGOROVA *et al.* 2008) consists of 28 strains derived from  
4 C57BL/6J (host) and PWD/Ph (donor) by J. Forejt at the Institute of Molecular  
5 Genetics AS CR in Prague, Czech Republic, covering all chromosomes and the  
6 mitochondrial genome. To improve reproductive fitness, chromosomes 10, 11 and X  
7 were split between three strains each carrying either the proximal (p), middle (m), or  
8 distal (d) portion of the respective chromosome.

9 The B6.MSM CSS panel (TAKADA *et al.* 2008) consists of 29 strains derived from  
10 C57BL/6J (host) and MSM/Ms (donor) by T. Shiroishi at National Institute of Genetics  
11 in Mishima, Japan covering all chromosomes. Chromosomes 2, 6, 7, 12, 13, and X  
12 were split between two strains each carrying either the centromeric (C) or telomeric  
13 (T) portion of the respective chromosome.

#### 14 **Genotyping**

15 DNA samples were prepared at the University of North Carolina according to the  
16 standard Affymetrix protocol and were hybridized on the Affymetrix Mouse Diversity  
17 Array (MDA) at the Jackson Laboratory as described previously in (YANG *et al.* 2009),  
18 (DIDION *et al.* 2012). The MDA probes (NCBI37/mm9) were mapped to genomic  
19 positions in GRCM38/mm10 assembly. CEL files and updated mapping information  
20 are available at [ftp://ftp.jax.org/petrs/MDA/raw\\_data/](ftp://ftp.jax.org/petrs/MDA/raw_data/). We used the R software  
21 package MouseDivGeno (DIDION *et al.* 2012) to extract intensities from CEL files, but  
22 for purposes of this study we developed a genotyping method that is based on the  
23 direct comparison of SNP probeset intensities between the sample and the founder  
24 strains of the corresponding panel. We selected the informative SNPs with intensity

1 differences between founder strains for each panel (101,397 SNPs for AXB/BXA,  
2 79,808 for LXS, 103,340 for BXD). Both selection of informative SNPs and SNP calls  
3 were probeset intensity based. For each strain and each SNP, the call can be either  
4 A (if the signal is close to the first founder), B (if the signal is close to the second  
5 founder), or N to represent “notA/notB”. We note that the N category includes both  
6 no-call and heterozygous genotypes and simply indicates that the intensity signal of  
7 the sample is far from both founder strains.

### 8 *Founder Haplotype Blocks*

9 In order to define the haplotype blocks of founder genotypes with allowance for errors  
10 in individual SNP level genotype calls, we applied the Viterbi algorithm to smooth the  
11 genotyping. We used software implemented in the Hidden Markov Model (HMM) R  
12 package (HIMMELMANN 2010). We call the Viterbi algorithm iteratively: at each  
13 iteration we re-estimated the HMM transition probabilities based on the Viterbi  
14 reconstruction of haplotype blocks. The iterations are repeated until we reach the  
15 convergence (JUANG and RABINER 1990).

16 Genetic maps computed from RIS panels consist of intervals assigned to one of the  
17 founders and gaps that delimit the interval within which the inferred recombination  
18 event(s) have occurred. We refer to the latter as “recombination intervals”.

19 For RIS panels we compared our maps to those available at  
20 <http://www.genenetwork.org>. GeneNetwork.org provides two genotype files for the  
21 BXDs—a “classic” set (pre-2017) of genotypes that have been used in most mapping  
22 studies since 2005 (SHIFMAN *et al.* 2006), and new consensus genotypes (2017) that  
23 include updated data for BXD43 through BXD220 that were collected November  
24 2015 and processed using the GigaMUGA array (MORGAN *et al.* 2016). In the current



1 study we have compared MDA genotypes to the classic genotypes used through the  
2 end of 2016.

### 3 ***Strain contamination***

4 An RIS or CSS is considered to be contaminated if it carries a segment of genome  
5 that did not originate from one of the two founder strains. We developed an HMM to  
6 search for contamination. In contrast to our previous HMM analysis, here we select  
7 SNPs that were not informative (both founders have the same signal). In a  
8 contaminated region the signal of a given strain is expected to contain a higher  
9 proportion of SNPs that differ from both founder strains. To avoid only intervals  
10 covering three or more non-informative SNPs were reported.

### 11 ***Copy number variants***

12 To determine if any of the RIS or CSS strains carried copy number variations (CNVs)  
13 that differed from the copy number in the founder strains, we applied the *simpleCNV*  
14 function of the MouseDivGeno package (DIDION *et al.* 2012). We accepted only those  
15 candidate CNV detections that had length >20kb and covered at least 10 IGP probes  
16 with *t*-statistic above 5 ( $p < 1E-6$ ).

### 17 ***Gene conversions***

18 Gene conversions are short tracts (<1kb) of nonreciprocal transfer of genetic  
19 information between two homologs that occurs during meiosis. In the case of RIS, it  
20 is difficult to distinguish gene conversion events from short haplotype blocks that are  
21 due to closely spaced recombination events that occurred in different meiosis.  
22 Therefore we restricted our attention to the CSS panels. We searched for single or  
23 small groups of adjacent SNPs that derive from the host genotype but occur on the  
24 donor chromosomes. We examined individual SNP intensities to identify those that

1 are clearly derived from the host strain and are present in a region of donor strain  
2 haplotype.

### 3 **Sister strains**

4 In a typical RIS panel the lineages that give rise to each RIS are independent and  
5 thus there should be no sharing of recombination events between strains. BXD  
6 strains from epoch III are an exception because they may share recombinations that  
7 arose in the outbreeding generations (PEIRCE *et al.* 2004a). Therefore, we excluded  
8 these strains from this analysis. We detected excess sharing of recombination  
9 junctions (Z-score>5.0) as an indicator that two strains are more similar than  
10 expected by chance.

## 11 **Results**

12 **Global genotyping error** - defined as a percentage of informative SNPs discordant  
13 with the haplotype assignment - is typically below 1%, but it is higher for haplotype  
14 blocks of *M. m. musculus* (PWD) and *M. m. molossinus* (MSM) origin than for *M. m.*  
15 *domesticus* blocks (B6, A, D2) (Suppl. Figure 1). This is likely to be caused by  
16 polymorphisms in or near the oligonucleotide probe sequence or its flanking  
17 restriction sites (DIDION *et al.* 2012). There are a few outlying strains with a higher  
18 error rate than other strains from the same panel (AXB1, BXD15, BXD25, BXD85,  
19 BXD65a (formerly known as BXD92), BXD93, B6.A#Chr7, B6.A#Chr10) likely due to  
20 low DNA quality or to processing of arrays.

21 **Residual heterozygosity** is present in some strains from each panel except for the  
22 AXB/BXA strains that appear to be fully inbred (Table 2). The detected heterozygous  
23 regions are an underestimate of percentage of segregating variation that is present in  
24 each strain because only a single animal per strain was genotyped. The presence of

1 heterozygous strains in large RIS panels is not surprising. We estimated that in the  
2 absence of selection a RIS strain needs on average 24 generations of sib-mating to  
3 reach a heterozygosity rate below 1% and 36 generations to reach complete fixation.  
4 However, there is a significant variation in the number of generations required to  
5 achieve these landmarks (BROMAN 2005). For a panel of 22 strains (the size of a full  
6 CSS panel), 53 generations are required on average to achieve complete fixation for  
7 all its strains in the absence of selection.

8 ***De novo* deletions and duplications:** We detected 64 *de novo* deletions and 14 *de*  
9 *novo* duplications, with lengths ranging from 21kb to 8.4Mb affecting 111 Ensembl  
10 genes (Suppl. Table 1). Table 2 summarizes frequency of strains with heterozygosity,  
11 deletions and duplications. We observe that longer time of inbreeding is associated  
12 with lower heterozygosity but more structural changes. This is seen most clearly by  
13 comparing different epochs of the BXD panel.

#### 14 **High-density genotyping identifies unexpected haplotype blocks in CSS panels**

15 We observe 27 haplotype blocks from the host strain in the proximal or distal regions  
16 of the donor chromosome across the three CSS panels. These events are  
17 undesirable but not unexpected due to the distribution of markers used for CSS  
18 development (NADEAU *et al.* 2000). We also observe strains in which a host  
19 haplotype block occurs in the middle of an introgressed donor chromosome or a  
20 donor haplotype block occurs in a host chromosome. We observed seven such  
21 events distributed across all three CSS panels. See Table 3 for details.

#### 22 **High-density genotyping improves map accuracy in RIS panels**

23 To validate our haplotype assignment and to estimate the level of improvement we  
24 compared our maps to the versions available at [www.genenetwork.org](http://www.genenetwork.org) (LXS, BXD) or

1 provided by Institut de recherches cliniques de Montréal (AXB/BXA). There was a  
2 high concordance (99.8% LXS, 98.1% BXD, 99.5 ABX/BXA) between new and old  
3 maps for intervals that were in assigned to one of the founder in both maps. The new  
4 maps decreased the level of uncertainty measured as the sum of length of  
5 recombination intervals by 66% in the AXB/BXA panel, 41% in the BXD panel and  
6 5% in the LXS panel. This improvement mirrors the increase in the number of  
7 informative markers: from 792 to 101,397 (AXB/BXA), from 3,796 to 103,341 (BXD),  
8 from 2,649 to 79,808 (LXS), respectively.

### 9 **Strain contamination in the AXB/BXA panel**

10 An unexpected observation in AXB/BXA RIS panel, was the presence of six intervals  
11 that are not derived from either A or B6 inbred strains. Three chromosomes of AXB1  
12 (x, y and z), two chromosomes of AXB2 and one chromosome of BXA1 (x and y) are  
13 affected. Based on comparison to genotypes from a large panel of inbred strains  
14 (YANG *et al.* 2011) we conclude that the contamination derived from a strain that is  
15 closely related to DBA/2J.

### 16 **Recombination rate**

17 The distribution of the number of recombination events is similar across all panels  
18 (see Figure 1, Suppl. Table 2) with the exception of the advanced RIS BXD (epoch  
19 III) that has more recombination events per chromosome due to additional  
20 generations of outbreeding. The number of recombination events per strain ranges  
21 from 32 (BXD32) to 84 (BXA17) among the classical RIS and from 60 (BXD53) to  
22 127 (BXD47) among the advanced BXD panel. These numbers of recombination  
23 events fall within the 95% prediction interval from simulations (using Python code  
24 from (WELSH and McMILLAN 2012)).

1 Most recombination events in the RIS panels are unique but some recombination  
2 intervals overlap and could result from independent recurrent events or from shared  
3 ancestry between RIS during the inbreeding process. The most frequently shared  
4 recombination event occurs in 8 out of 25 samples of the AXB RIS panel (Chr10:  
5 66,730,215-67,348,211). Moreover, in 7 out of 8 cases ( $p=0.07$ ) the polarity of the  
6 event is in the same direction: from B6 segment (proximal - 66730214 bp) to A/J  
7 segment (67348212 bp - distal). Additional shared recombination intervals are listed  
8 in Suppl. Table 3 and the recombination frequency is visualized in Suppl. Figure 3.  
9 Higher recombination rates observed in the distal region of chromosomes are  
10 expected (LIU *et al.* 2014).

### 11 **Sister strains**

12 Sister strains are strains related by descent from incompletely inbred ancestors  
13 during the breeding process. They can be identified because they share a large  
14 number of recombination intervals with the same proximal to distal polarity of founder  
15 haplotypes. Not surprisingly, most of the sister strains are detected for the advanced  
16 BXD panel (6 pairs + 6 larger groups, totally comprising of 40 strains). However, two  
17 pairs of strains are present in the AXB and LXS panels, AXB6 - AXB12 and LXS94 -  
18 LXS107. These strains share more recombination intervals with the same founder  
19 strain polarity than expected by a chance (Figure 2).

### 20 **The MDA array detects short gene conversions in CSS panels**

21 We searched for putative gene conversions in the introgressed donor chromosomes  
22 of CSS panels. We identified small regions typically spanning just one informative  
23 SNP, that have genotypes consistent with the host strain instead of the donor strain

1 (Figure 3). In total, we identified 28 putative gene conversions: 17 in the B6.A CSS  
2 panel, 7 in the B6.PWD CSS panel and 4 in the B6.MSM CSS panel (Table 4).

### 3 **Online access to genetics maps and MDA genotypes**

4 For easy access, we provide a compilation of Mouse Diversity Array data, annotation  
5 and supporting software at <http://churchill-lab.jax.org/website/MDA>. Resources to  
6 support our analysis of RIS and CSS strains include an online viewer where maps  
7 can be viewed and downloaded either as a list of intervals or as CSV files ready to be  
8 imported to the R/qtl package (BROMAN and SEN 2009). Source code for the viewer is  
9 also available on Github, <https://github.com/simecek/RIS-map-viewer>. Researchers  
10 interested in comparing those reference populations to genotypes of other mouse  
11 strains processed on MDA arrays can use the MDA viewer. The entire database  
12 consisting of 1,902 MDA arrays is available for download as SQLite database or as  
13 individual CEL files <ftp://ftp.jax.org/petrs/MDA/>.

14

### 15 **Discussion**

16 We have characterized 180 RIS and 79 CSS strains from six popular and valuable  
17 resources and provided online access to these data. These panels were developed  
18 at different times and genotyped with lower density sets of markers. High-density  
19 genotyping with the number of informative SNPs, ranging between 79,000 and  
20 257,000, provide maps with higher resolution. In this study we achieved a median  
21 spacing between informative markers 5.7 kb (AXB), 5.4 kb (BXD), 5.6 kb (LXS), 4.6  
22 kb (B6.PWD) and 5.2 kb (B6.MSM), respectively. This enabled us to identify unusual  
23 features such as regions of residual heterozygosity, contamination by a non-founder  
24 strain and *de novo* structural variants. These genotyping arrays are part of 1902

1 samples processed on MDA platform that can be accessed from [http://churchill-](http://churchill-lab.jax.org/website/MDA)  
2 [lab.jax.org/website/MDA](http://churchill-lab.jax.org/website/MDA).

3 Genetic reference panels are valuable, in part, because of the ability of generate  
4 animals with identical genomes in the number and timespan dictated by the  
5 researcher. Replication increases the accuracy of phenotype measurements  
6 (BELKNAP 1998) and allows for integration of data over space, time and environment.  
7 While it is convenient to think of all mice from an inbred strain as identical, we provide  
8 evidence that this view is not always warranted. Residual heterozygosity may be due  
9 to stochasticity in the inbreeding process or it may reflect biological constraints that  
10 prevent full inbreeding of a strain. Genetic drift operates in each of these populations  
11 and low-density genotyping in selected regions of the genome leaves room for  
12 undesired or unexpected surprises. In a typical CSS strain the average proportion of  
13 the donor genome present in other chromosomes is expected to be 0.2% (Nadeau  
14 2000). Over our three CSS panels, the average length of unexpected genotype was  
15 1.5 Mb. The length of intervals ranges (Table3) from less than 1 Mb (1 gene) to 20  
16 Mb (138 genes).

17 For gene conversions, whole genome sequencing of CSS panels (and RIS) will likely  
18 reveal more examples and provide better estimates of converted regions and their  
19 length. However, our results suggest that gene conversions are more probable in  
20 regions where founders' genomes are very similar. We observe significantly more  
21 conversions on the B6.A panel than in the other two CSS panels (17 vs. 7 and 4,  
22 Fisher exact test,  $p=0.046$ ) despite the fact that the number of informative markers is  
23 lower and therefore our ability to detect gene conversions reduced. Based on this  
24 result we hypothesize that gene conversions occur preferably in regions of low

1 sequence diversity between homologous chromosomes. If that is true then they will  
2 have fewer genetic consequences due to lower chance to cause distinguishing  
3 polymorphism. Roughly, we estimate that 0.005% of the genome is affected by gene  
4 conversion (avg. # gene conversions / # informative SNPs = 28 / 3 / 200,000). The  
5 real number of gene conversions is likely to be higher because we were only able to  
6 identify gene conversions that overlap informative SNP probes in the array.

7 We found no evidence of allelic imbalance that has been observed in other species  
8 (TAUDT *et al.* 2016). Nor did we detect any epistatic selection between founder strains  
9 or alleles with different subspecies origin. This is in sharp contrast with mouse  
10 multiparent populations such as the Collaborative Cross and Diversity Outbred  
11 (CHESLER *et al.* 2016); (CC genomes 2017) and (SHORTER 2017). Due to limited  
12 number of strains in mouse RI panels, we may have missed small distortions.

13 We observed an inverse relationship between residual heterozygosity and drift (Table  
14 2). For a given panel, even 20 generations of inbreeding is not enough to fix all  
15 heterozygous regions. On the other hand, populations kept for many generations will  
16 accumulate SNPs, small indels, and structural variants in their genomes (SIMECEK *et*  
17 *al.* 2015) (CC genomes 2017). Strategies to reduce drift in breeding colonies have  
18 been developed, including the embryo cryopreservation program at The Jackson  
19 Laboratory (TAFT *et al.* 2006). However, genetic drift can be also harnessed by  
20 geneticists to simplify and accelerate the identification of causal variants responsible  
21 for phenotypic differences between substrains (CC genomes 2017). These so call  
22 reduced complexity crosses are excellent examples of the potential benefits of  
23 genetic drift (KUMAR *et al.* 2013).



## 1 **Acknowledgments**

2 The work was supported by in part by NIH grants P50GM076468 (GAC),  
3 U19AI100625 (FPMV) and U01 AA016662 (RWW), a grant-in-aid for scientific  
4 research from Japan Society for the Promotion Science grant No. 17018033 (TS,  
5 TT), Canadian Institutes of Health Research MOP-93583 (CFD, MPSB) and by the  
6 Czech Science Foundation grant 16-01969S, LM2015040 and LQ1604 projects from  
7 the Ministry of Education, Youth and Sports of the Czech Republic (JF, PS).  
8 Genotyping of the BXD RIS was supported by the University of Tennessee Center for  
9 Integrative and Translational Science.

## 10 **References:**

- 11 BECK, J. A., S. LLOYD, M. HAFEZPARAST, M. LENNON-PIERCE, J. T. EPPIG *et al.*, 2000 Genealogies of  
12 mouse inbred strains. *Nature genetics* **24**: 23-25.
- 13 BELKNAP, J., 1998 Effect of within-strain sample size on QTL detection and mapping using  
14 recombinant inbred mouse strains. *Behavior genetics* **28**: 29-38.
- 15 BROMAN, K. W., 2005 The genomes of recombinant inbred lines. *Genetics* **169**: 1133-1146.
- 16 BROMAN, K. W., and S. SEN, 2009 *A Guide to QTL Mapping with R/qtl*. Springer.
- 17 BUCHNER, D. A., and J. H. NADEAU, 2015 Contrasting genetic architectures in different mouse  
18 reference populations used for studying complex traits. *Genome research* **25**: 775-791.
- 19 CHESLER, E. J., D. M. GATTI, A. P. MORGAN, M. STROBEL, L. TREPANIER *et al.*, 2016 Diversity Outbred  
20 Mice at 21: Maintaining Allelic Variation in the Face of Selection. *G3: Genes| Genomes|*  
21 *Genetics* **6**: 3893-3902.
- 22 CHINWALLA, A. T., L. L. COOK, K. D. DELEHAUNTY, G. A. FEWELL, L. A. FULTON *et al.*, 2002 Initial  
23 sequencing and comparative analysis of the mouse genome. *Nature* **420**: 520-562.
- 24 CHURCHILL, G. A., D. M. GATTI, S. C. MUNGER and K. L. SVENSON, 2012 The diversity outbred mouse  
25 population. *Mammalian genome* **23**: 713-718.

- 1 CONSORTIUM, C. C., 2012 The genome architecture of the Collaborative Cross mouse genetic  
2 reference population. *Genetics* **190**: 389-401.
- 3 DIDION, J. P., H. YANG, K. SHEPPARD, C. P. FU, L. McMILLAN *et al.*, 2012 Discovery of novel variants in  
4 genotyping arrays improves genotype retention and reduces ascertainment bias. *BMC*  
5 *Genomics* **13**: 34.
- 6 GREGOROVA, S., P. DIVINA, R. STORCHOVA, Z. TRACHTULEC, V. FOTOPULOVA *et al.*, 2008 Mouse  
7 consomic strains: exploiting genetic divergence between *Mus m. musculus* and *Mus m.*  
8 *domesticus* subspecies. *Genome Res* **18**: 509-515.
- 9 HIMMELMANN, L., 2010 HMM: HMM - Hidden Markov Models, pp. R package version 1.0.
- 10 JUANG, B.-H., and L. R. RABINER, 1990 The segmental K-means algorithm for estimating  
11 parameters of hidden Markov models. *IEEE Transactions on Acoustics, Speech, and*  
12 *Signal Processing* **38**: 1639-1641.
- 13 KEANE, T. M., L. GOODSTADT, P. DANECEK, M. A. WHITE, K. WONG *et al.*, 2011 Mouse genomic variation  
14 and its effect on phenotypes and gene regulation. *Nature* **477**: 289-294.
- 15 KUMAR, V., K. KIM, C. JOSEPH, S. KOURRICH, S.-H. YOO *et al.*, 2013 C57BL/6N mutation in cytoplasmic  
16 FMRP interacting protein 2 regulates cocaine response. *Science* **342**: 1508-1512.
- 17 LIU, J., H. SONG, D. LIU, T. ZUO, F. LU *et al.*, 2014 Extensive recombination due to heteroduplexes  
18 generates large amounts of artificial gene fragments during PCR. *PloS one* **9**: e106658.
- 19 MORGAN, A. P., J. P. DIDION, A. G. DORAN, J. M. HOLT, L. McMILLAN *et al.*, 2016 Whole Genome  
20 Sequence of Two Wild-Derived *Mus musculus domesticus* Inbred Strains, LEWES/Eij and  
21 ZALENDE/Eij, with Different Diploid Numbers. *G3: Genes| Genomes| Genetics* **6**: 4211-  
22 4216.
- 23 NADEAU, J. H., J. FOREJT, T. TAKADA and T. SHIROISHI, 2012 Chromosome substitution strains: gene  
24 discovery, functional analysis, and systems studies. *Mamm Genome* **23**: 693-705.
- 25 NADEAU, J. H., J. B. SINGER, A. MATIN and E. S. LANDER, 2000 Analysing complex genetic traits with  
26 chromosome substitution strains. *Nat Genet* **24**: 221-225.

- 1 NESBITT, M. N., and E. SKAMENE, 1984 Recombinant inbred mouse strains derived from A/J and  
2 C57BL/6J: a tool for the study of genetic mechanisms in host resistance to infection and  
3 malignancy. *J Leukoc Biol* **36**: 357-364.
- 4 PEIRCE, J. L., L. LU, J. GU, L. M. SILVER and R. W. WILLIAMS, 2004a A new set of BXD recombinant  
5 inbred lines from advanced intercross populations in mice. *BMC genetics* **5**: 7.
- 6 PEIRCE, J. L., L. LU, J. GU, L. M. SILVER and R. W. WILLIAMS, 2004b A new set of BXD recombinant  
7 inbred lines from advanced intercross populations in mice. *BMC Genet* **5**: 7.
- 8 SHIFMAN, S., J. T. BELL, R. R. COPLEY, M. S. TAYLOR, R. W. WILLIAMS *et al.*, 2006 A high-resolution  
9 single nucleotide polymorphism genetic map of the mouse genome. *PLoS Biol* **4**: e395.
- 10 SHORTER, J., 2017 Designer protein disaggregases to counter neurodegenerative disease. *Current*  
11 *Opinion in Genetics & Development* **44**: 1-8.
- 12 SIMECEK, P., G. A. CHURCHILL, H. YANG, L. B. ROWE, L. HERBERG *et al.*, 2015 Genetic analysis of  
13 substrain divergence in non-obese diabetic (NOD) mice. *G3: Genes| Genomes| Genetics* **5**:  
14 771-775.
- 15 TAFT, R. A., M. DAVISSON and M. V. WILES, 2006 Know thy mouse. *TRENDS in Genetics* **22**: 649-653.
- 16 TAKADA, T., A. MITA, A. MAENO, T. SAKAI, H. SHITARA *et al.*, 2008 Mouse inter-subspecific consomic  
17 strains for genetic dissection of quantitative complex traits. *Genome Res* **18**: 500-508.
- 18 TAUDT, A., M. COLOMÉ-TATCHÉ and F. JOHANNES, 2016 Genetic sources of population epigenomic  
19 variation. *Nature Reviews Genetics*.
- 20 TAYLOR, B. A., D. W. BAILEY, M. CHERRY, R. RIBLET and M. WEIGERT, 1975 Genes for immunoglobulin  
21 heavy chain and serum prealbumin protein are linked in mouse. *Nature* **256**: 644-646.
- 22 TAYLOR, B. A., C. WNEK, B. S. KOTLUS, N. ROEMER, T. MACTAGGART *et al.*, 1999 Genotyping new BXD  
23 recombinant inbred mouse strains and comparison of BXD and consensus maps. *Mamm*  
24 *Genome* **10**: 335-348.
- 25 WELSH, C. E., and L. MCMILLAN, 2012 Accelerating the inbreeding of multi-parental recombinant  
26 inbred lines generated by sibling matings. *G3: Genes| Genomes| Genetics* **2**: 191-198.

- 1 WILLIAMS, R. W., B. BENNETT, L. LU, J. GU, J. C. DEFRIES *et al.*, 2004 Genetic structure of the LXS panel  
2 of recombinant inbred mouse strains: a powerful resource for complex trait analysis.  
3 *Mamm Genome* **15**: 637-647.
- 4 WILLIAMS, R. W., J. GU, S. QI and L. LU, 2001 The genetic structure of recombinant inbred mice:  
5 high-resolution consensus maps for complex trait analysis. *Genome biology* **2**:  
6 research0046. 0041.
- 7 YANG, H., Y. DING, L. N. HUTCHINS, J. SZATKIEWICZ, T. A. BELL *et al.*, 2009 A customized and versatile  
8 high-density genotyping array for the mouse. *Nat Methods* **6**: 663-666.
- 9 YANG, H., J. R. WANG, J. P. DIDION, R. J. BUUS, T. A. BELL *et al.*, 2011 Subspecific origin and haplotype  
10 diversity in the laboratory mouse. *Nature genetics* **43**: 648-655.

11

12

### 13 **Tables and Figures:**

14 **Figure 1: Number of founder haplotype blocks in RIS panels.** The number of  
15 founder blocks for each strain is indicated as a point, with jitter for clarity. The boxplot  
16 indicates median and quartiles of each panel. Results for the BXD panel are broken  
17 down by three breeding epochs (I, II and III); the increased number of recombination  
18 event in epoch III refelects additional generation of outbreeding used in the derivation  
19 of these strains.

20 **Figure 2: Sister strains in RIS panels.** Side-by-side comparison of sister strains  
21 AXB6 vs AXB12 (red = B6, blue = A) (A) and LXS94 vs LXS107 (red = L, blue = S)  
22 (B) illustrates the extent of shared haplotype blocks.

23 **Figure 3: Gene conversion in a CSS strain.** Strain B6.PWD13 has an unexpected  
24 founder genotype at marker JAX00357227 marker (Chr 13: 47,505,217 bp). Average

1 and contrast signal intensities are plotted for all B6.PWD strains. Numbers indicate  
 2 the CSS strains by substituted chromosome with B6.PWD13 is highlighted by the red  
 3 circle. Also indicated on the plot are founder strains B6, and PWD and their F1  
 4 hybrids. The B.PWD13 data should be similar to PWD but it is actually close to B6  
 5 indicating a putative gene conversion. Grey letters indicate genotype calls for 1902  
 6 additional samples in the MDA database (A = first parent / B = second parent / H =  
 7 heterozygous / V = vino / N = no call).

8

9 **Table 1:** Overview of the six panels: a type, founder strains and a number of strains.

| Panel   | Type | Founder strains |        | # strains |
|---------|------|-----------------|--------|-----------|
| AXB/BXA | RIS  | C57BL/6J        | A/J    | 25        |
| LXS     | RIS  | ILS             | ISS    | 64        |
| BXD     | RIS  | C57BL/6J        | DBA/2J | 91        |
| B6.A    | CSS  | C57BL/6J        | A/J    | 22        |
| B6.PWD  | CSS  | C57BL/6J        | PWD/Ph | 28        |
| B6.MSM  | CSS  | C57BL/6J        | MSM/Ms | 29        |

10

11 **Table 2:** Residual heterozygosity and CNV (deletion / extra copy) in the six panels.

| panel                 | number of strains | # strains with heterozygous segment |     | # strains with deletion |     | # strains with extra copy |     |
|-----------------------|-------------------|-------------------------------------|-----|-------------------------|-----|---------------------------|-----|
| <b>AXB</b>            | 25                | 0                                   | 0%  | 5                       | 20% | 1                         | 4%  |
| <b>LXS</b>            | 64                | 35                                  | 55% | 12                      | 19% | 1                         | 2%  |
| <b>BXD, Epoch I</b>   | 26                | 0                                   | 0%  | 15                      | 58% | 6                         | 23% |
| <b>BXD, Epoch II</b>  | 8                 | 3                                   | 38% | 1                       | 13% | 1                         | 13% |
| <b>BXD, Epoch III</b> | 57                | 34                                  | 60% | 7                       | 12% | 2                         | 4%  |
| <b>B6.A</b>           | 22                | 3                                   | 14% | 2                       | 9%  | 2                         | 9%  |
| <b>B6.PWD</b>         | 28                | 9                                   | 32% | 0                       | 0%  | 0                         | 0%  |
| <b>B6.MSM</b>         | 29                | 2                                   | 7%  | 12                      | 41% | 1                         | 3%  |

12

1 **Table 3:** Unexpected haplotype blocks in all CSS panels.

| Panel         | Strain                        | Chr       | Start           | End             | Length         | shoud be        | actually is | # Ensembl genes |     |
|---------------|-------------------------------|-----------|-----------------|-----------------|----------------|-----------------|-------------|-----------------|-----|
| A.B6          | C57BL/6J-Chr1A/J/NaJ          | 1         | 3211051         | 22830804        | 1961975        | 4               | A           | B6              | 117 |
| A.B6          | C57BL/6J-Chr1A/J/NaJ          | 1         | 19244207        | 19536569        | 5              | 1               | A           | B6              | 25  |
| A.B6          | C57BL/6J-Chr4A/J/NaJ          | 4         | 15479971        | 15616674        | 5              | 7               | A or B6     | Het             | 63  |
| A.B6          | C57BL/6J-Chr5A/J/NaJ          | 5         | 14941090        | 15056704        | 6              | 9               | A or B6     | Het             | 16  |
| <b>A.B6</b>   | <b>C57BL/6J-Chr8A/J/NaJ</b>   | <b>11</b> | <b>36650633</b> | <b>42751289</b> | <b>6100657</b> | <b>B6</b>       | <b>A</b>    | 28              |     |
| A.B6          | C57BL/6J-Chr10A/J/NaJ         | 10        | 12764577        | 12961525        | 8              | 8               | A or B6     | Het             | 102 |
| A.B6          | C57BL/6J-Chr16A/J/NaJ         | 16        | 93670025        | 98040454        | 4370430        | A               | B6          | 47              |     |
| A.B6          | C57BL/6J-Chr17A/J/NaJ         | 17        | 3071428         | 6154773         | 3083346        | A               | B6          | 25              |     |
| <b>PWD.B6</b> | <b>C57BL/6J-Chr1PWD/ForeJ</b> | <b>3</b>  | <b>12327591</b> | <b>14357520</b> | <b>2029928</b> | <b>4</b>        | <b>B6</b>   | <b>Het</b>      | 138 |
| PWD.B6        | C57BL/6J-Chr3PWD/ForeJ        | 3         | 24121111        | 24179212        | 58102          | 9               | PWD         | B6              | 1   |
| <b>PWD.B6</b> | <b>C57BL/6J-Chr4PWD/ForeJ</b> | <b>5</b>  | <b>14895608</b> | <b>15172528</b> | <b>8</b>       | <b>2769204</b>  | <b>B6</b>   | <b>Het</b>      | 33  |
| PWD.B6        | C57BL/6J-Chr9PWD/ForeJ        | 9         | 12394465        | 12408788        | 9              | 0               | PWD         | B6              | 3   |
| PWD.B6        | C57BL/6J-Chr10.1PWD/ForeJ     | 10        | 57607018        | 60613285        | 3006268        | 0               | PWD or B6   | Het             | 37  |
| PWD.B6        | C57BL/6J-Chr10.2PWD/ForeJ     | 10        | 45150578        | 51959138        | 6808561        | 10163808        | B6          | Het             | 21  |
| PWD.B6        | C57BL/6J-Chr10.2PWD/ForeJ     | 10        | 95379265        | 4               | 6258820        | 4               | PWD or B6   | Het             | 32  |
| PWD.B6        | C57BL/6J-Chr10.3PWD/ForeJ     | 10        | 73546548        | 74465198        | 918651         | 9               | B6          | Het             | 1   |
| PWD.B6        | C57BL/6J-Chr11.1PWD/ForeJ     | 11        | 3105931         | 3877120         | 771190         | 9               | PWD or B6   | Het             | 29  |
| PWD.B6        | C57BL/6J-Chr11.1PWD/ForeJ     | 11        | 79051423        | 79574667        | 523245         | 9               | B6          | Het             | 10  |
| PWD.B6        | C57BL/6J-Chr11.2PWD/ForeJ     | 11        | 35418368        | 43961733        | 8543366        | 12058864        | B6          | Het             | 53  |
| PWD.B6        | C57BL/6J-Chr11.3PWD/ForeJ     | 11        | 12196784        | 9               | 1379201        | 9               | PWD         | B6              | 60  |
| PWD.B6        | C57BL/6J-Chr12PWD/ForeJ       | 12        | 11683119        | 12001476        | 3              | 5               | PWD         | B6              | 16  |
| PWD.B6        | C57BL/6J-Chr19PWD/ForeJ       | 19        | 60070470        | 61261300        | 1190831        | 16741656        | PWD         | B6              | 20  |
| PWD.B6        | C57BL/6J-ChrX.3PWD/ForeJ      | X         | 8               | 0               | 2176453        | 0               | PWD         | B6              | 16  |
| MSM.B6        | C57BL/6J-Chr4-MSM             | 4         | 24485868        | 24671707        | 185840         | MSM             | B6          | 3               |     |
| MSM.B6        | C57BL/6J-Chr6C-MSM            | 6         | 3180317         | 3410126         | 229810         | 14716065        | MSM         | B6              | 2   |
| MSM.B6        | C57BL/6J-Chr6T-MSM            | 6         | 12116007        | 12196784        | 1              | 9               | MSM         | B6              | 39  |
| MSM.B6        | C57BL/6J-Chr11-MSM            | 11        | 9               | 9               | 807771         | MSM             | B6          | 21              |     |
| <b>MSM.B6</b> | <b>C57BL/6J-Chr12C-MSM</b>    | <b>1</b>  | <b>19515154</b> | <b>19528576</b> | <b>6</b>       | <b>134224</b>   | <b>B6</b>   | <b>Het</b>      | 2   |
| <b>MSM.B6</b> | <b>C57BL/6J-Chr13T-MSM</b>    | <b>18</b> | <b>23532046</b> | <b>26528643</b> | <b>2996598</b> | <b>12254540</b> | <b>B6</b>   | <b>Het</b>      | 24  |
| MSM.B6        | C57BL/6J-Chr14-MSM            | 14        | 12475101        | 1               | 9              | 2205619         | MSM         | B6              | 10  |
| MSM.B6        | C57BL/6J-Chr15-MSM            | 15        | 10241546        | 10362802        | 1212566        | MSM             | B6          | 46              |     |

|        |                    | 1  |          | 6        |         |     |    |    |
|--------|--------------------|----|----------|----------|---------|-----|----|----|
| MSM.B6 | C57BL/6J-Chr16-MSM | 16 | 95378122 | 98069653 | 2691532 | MSM | B6 | 28 |
| MSM.B6 | C57BL/6J-Chr19-MSM | 19 | 57068415 | 60681568 | 3613154 | MSM | B6 | 27 |

1

2 **Table 4:** Short gene conversions in CSS panels.

| Panel  | snpld       | chr | position | alleleA | alleleB | rsNumber   | GeneSymbol    | functionClass               |
|--------|-------------|-----|----------|---------|---------|------------|---------------|-----------------------------|
| B6.A   | JAX00254769 | 1   | 72747910 | C       | T       | rs50360495 | N/A           | Intergenic                  |
| B6.A   | JAX00506852 | 2   | 1,49E+08 | G       | T       | rs28225187 | Napb          | Intron                      |
| B6.A   | JAX00517779 | 3   | 28468788 | G       | A       | rs29689086 | Tnik          | Intron                      |
| B6.A   | JAX00518655 | 3   | 31991151 | G       | A       | rs49710262 | N/A           | Intergenic                  |
| B6.A   | JAX00544220 | 4   | 7146585  | C       | T       | rs27658062 | N/A           | Intergenic                  |
| B6.A   | JAX00548886 | 4   | 41108534 | C       | T       | rs27765251 | N/A           | Intergenic                  |
| B6.A   | JAX00589927 | 5   | 1,01E+08 | A       | G       | rs31987722 | N/A           | Intergenic                  |
| B6.A   | JAX00630284 | 6   | 1,46E+08 | C       | A       | rs30468531 | ltpr2         | Intron                      |
| B6.A   | JAX00154063 | 7   | 89592185 | G       | A       | rs51617084 | N/A           | Intergenic                  |
| B6.A   | JAX00015582 | 10  | 20181498 | G       | C       | rs29339980 | Mtap7         | Intron                      |
| B6.A   | JAX00290764 | 10  | 62127533 | C       | T       | rs46386144 | N/A           | Intergenic                  |
| B6.A   | JAX00297554 | 10  | 1,03E+08 | A       | G       | rs47130688 | Lrriq1        | Intron                      |
| B6.A   | JAX00306860 | 11  | 30181044 | G       | A       | rs26860826 | Spnb2         | Intron                      |
| B6.A   | JAX00364408 | 13  | 81444533 | G       | A       | rs29225071 | Gpr98         | Exon( Coding nonsynonymous) |
| B6.A   | JAX00065772 | 15  | 1,03E+08 | T       | C       | rs13482749 | Map3k12       | Exon(Coding synonymous)     |
| B6.A   | JAX00431551 | 17  | 11319650 | G       | A       | rs33634737 | Park2         | Intron                      |
| B6.A   | JAX00439159 | 17  | 44034125 | A       | G       | rs33551899 | Rcan2         | Intron                      |
| B6.PWD | JAX00486683 | 2   | #####    | A       | C       | rs28259595 | 5830434P21Rik | Intron                      |
| B6.PWD | JAX00507172 | 2   | #####    | C       | T       | rs27373039 | 2310001A20Rik | Intron                      |
| B6.PWD | JAX00171651 | 9   | #####    | C       | T       | rs30230810 | Lman1l        | Intron                      |
| B6.PWD | JAX00708417 | 9   | #####    | C       | A       | rs36948070 | Sacm1l        | Intron                      |
| B6.PWD | JAX00357227 | 13  | #####    | T       | C       | rs47221967 | N/A           | Intergenic                  |
| B6.PWD | JAX00072010 | 16  | #####    | A       | G       | rs50630491 | Cypr1         | Intron                      |
| B6.PWD | JAX00477099 | 19  | #####    | T       | C       | rs31075313 | Plce1         | Intron                      |
| B6.MSM | JAX00250951 | 1   | 53216029 | G       | T       | rs32733914 | Pms1          | Intron                      |
| B6.MSM | JAX00526581 | 3   | 72819995 | G       | A       | rs37284921 | N/A           | Intergenic                  |
| B6.MSM | JAX00599346 | 5   | 1,4E+08  | T       | G       | rs32296220 | A930017N06Rik | Intron                      |
| B6.MSM | JAX00427113 | 16  | 87664971 | C       | A       | rs47532274 | N/A           | Intergenic                  |

3

4 **Supplemental Figure 1:** Error rate. Each strain is plotted by two dots of different  
5 colors (one dot = one founder strain). A dot represents a percentage of markers  
6 contradicting the estimated founder strain.

- 1 **Supplemental Figure 2:** Percentage of genome attributed to the first or the second
- 2 RIS founder strain (red = B6 or ILS, blue = A/J or D2 or ISS, green = heterozygous)
- 3 **Supplemental Figure 3:** Number of recombinations (smoothed by 10Mb window).
- 4 **Supplemental Table 1:** The list of RIS CNVs (deletion / extra copy).
- 5 **Supplemental Table 2:** Number of haplotype blocks (first founder / second founder /
- 6 heterozygous) and the total number of recombinations.
- 7 **Supplemental Table 3:** The list of all recombination intervals (and the frequency of
- 8 recombination).
- 9
- 10
- 11
- 12



# JAX00357227 (chr13: 47505217)

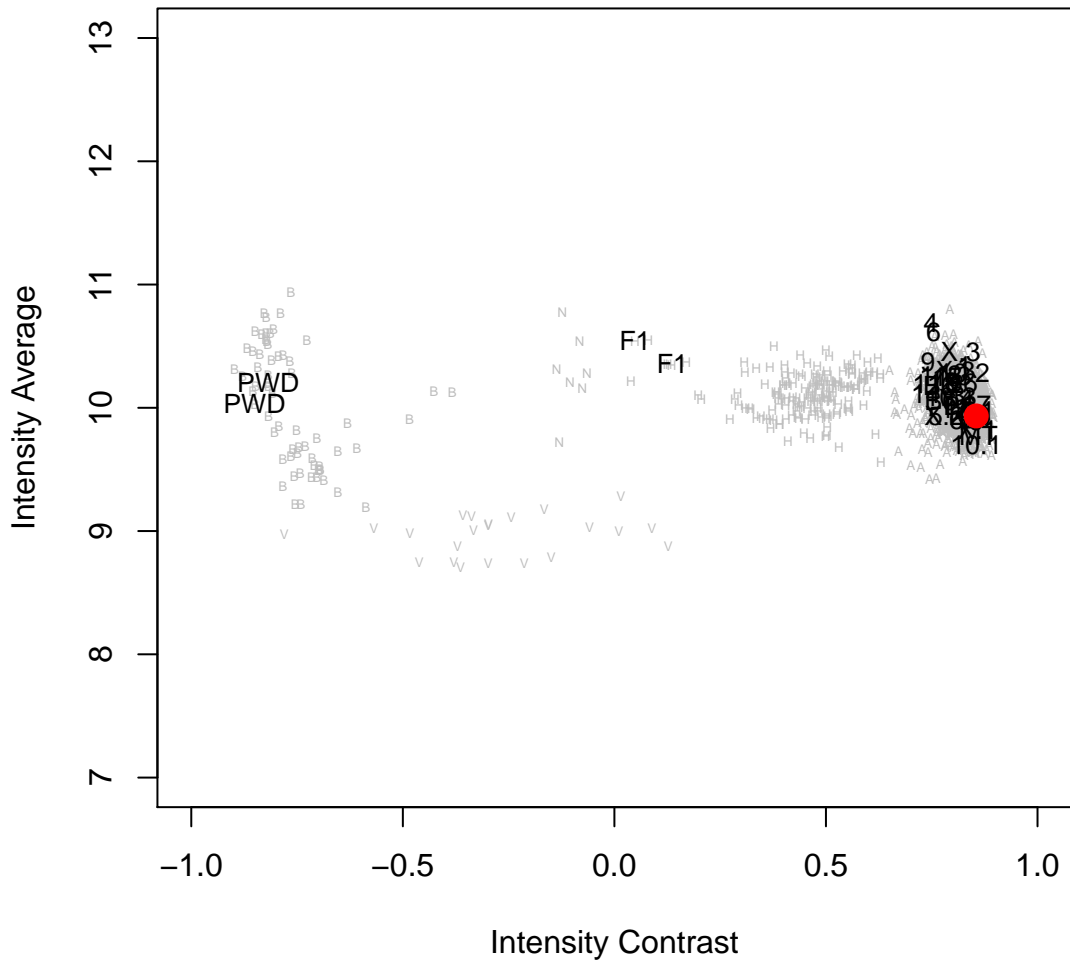

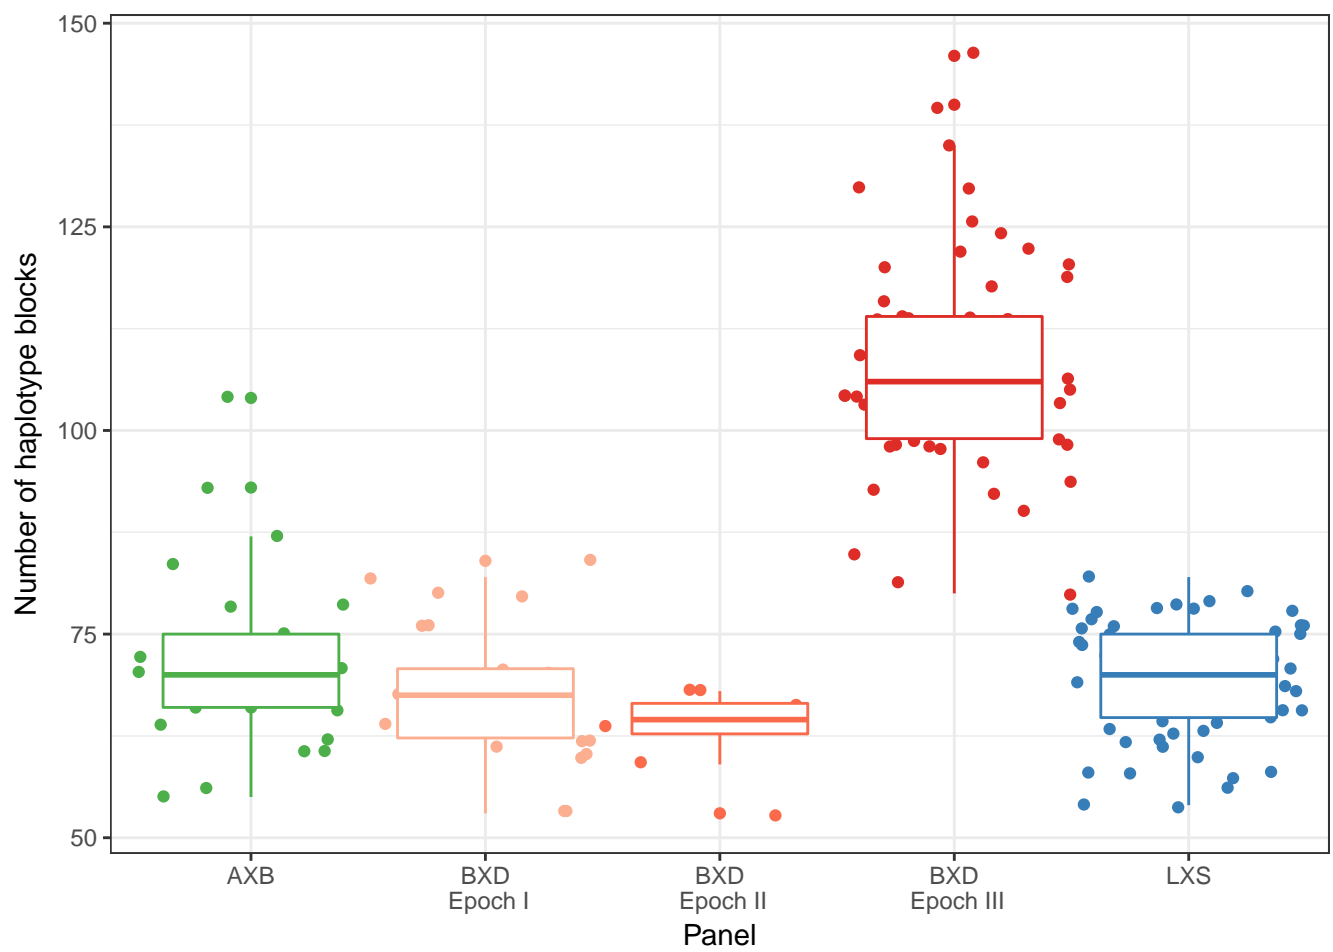

**AXB12, AXB6 (11 shared recombination events)**

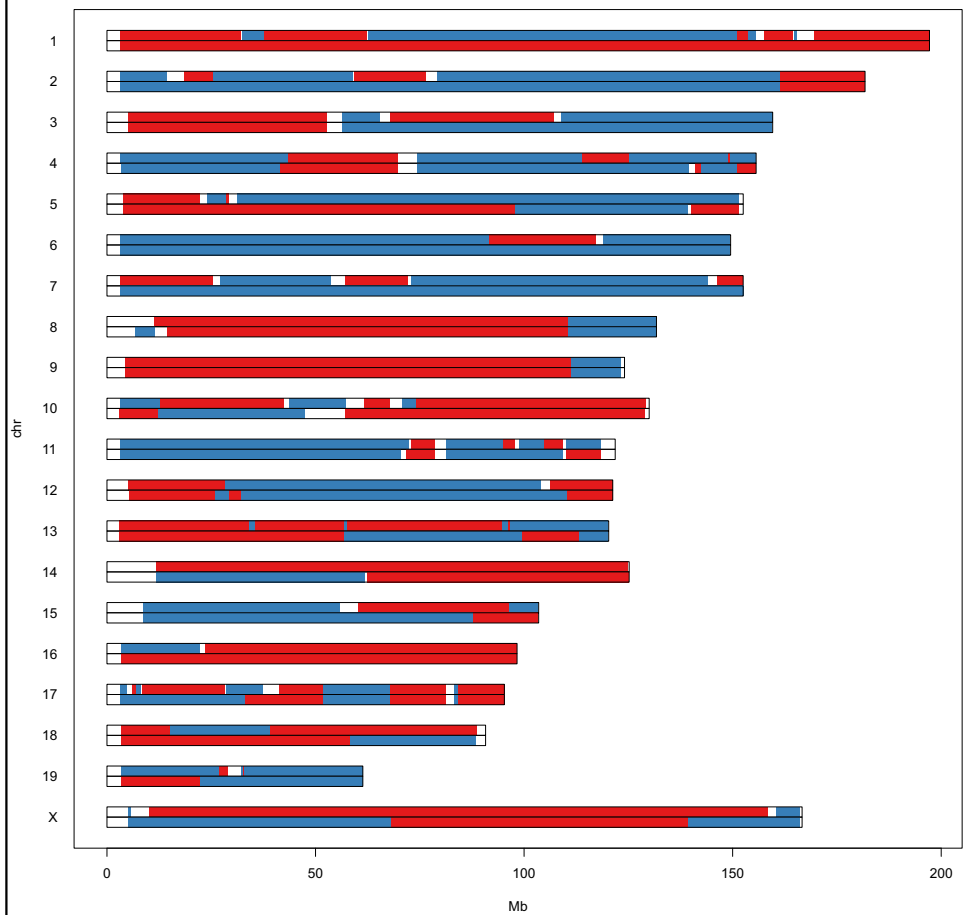

**LXS107, LXS94 (35 shared recombination events)**

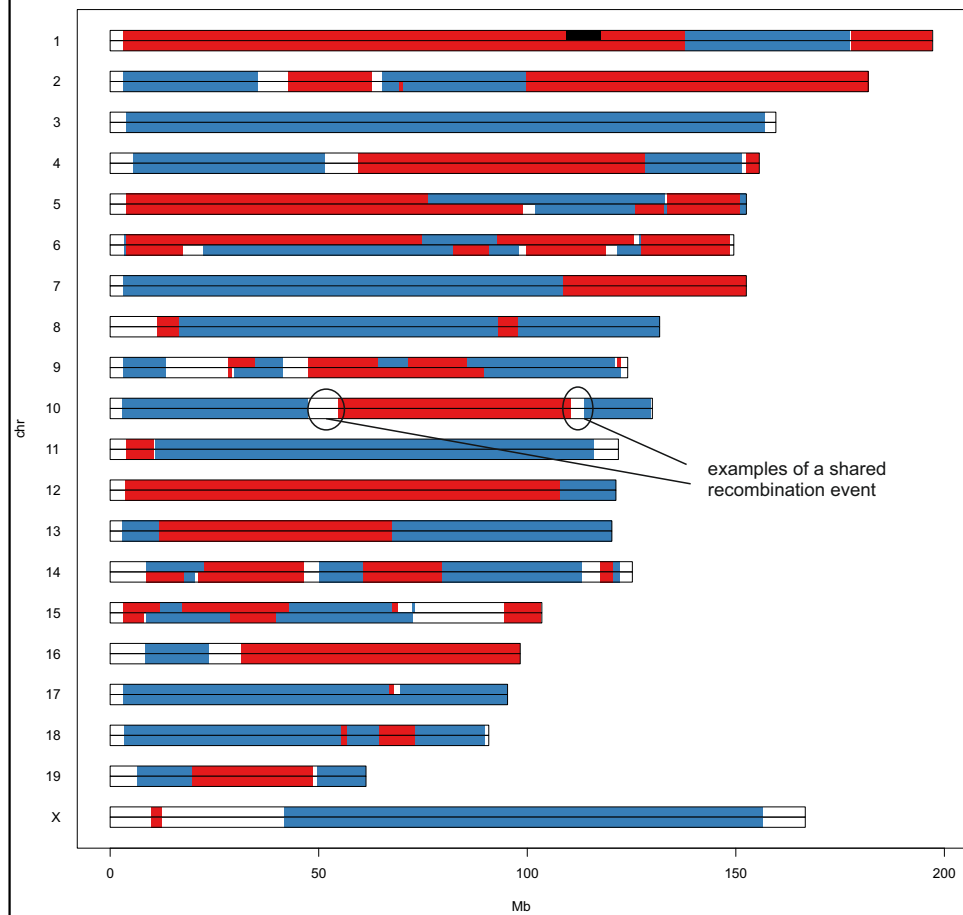

Source: https://www.biorxiv.org/content/10.1101/155507v1.full.pdf
